# Supplementary material for: Making the choice between bioelectrical impedance measures for body hydration status assessment
Source: Springer Nature journal article supplement (doi:10.1038/s41598-021-87253-4), 2021-04-08
Supplement: 41598_2021_87253_MOESM1_ESM.pdf [file 41598_2021_87253_MOESM1_ESM.pdf]

## **Supplementary materials**

**Title:** Making the choice between bioelectrical impedance measures for body hydration status assessment

### **Authors:**

Dmitry M. Davydov <sup>a, \*</sup>, PhD, MD

Andrey Boev <sup>b</sup>

Stas Gorbunov <sup>b</sup>

### **Affiliations:**

<sup>a</sup> Laboratory of Neuroimmunopathology, Institute of General Pathology and Pathophysiology, Russian Academy of Sciences, 8 Baltiyskaia ul., Moscow, 125315, Russia. Email: [d.m.davydov@gmail.com](mailto:d.m.davydov@gmail.com)

<sup>b</sup> Departments of Research and Development, Aura Devices Inc., 1013 Centre Road, Suite 403-B, Wilmington, Delaware, 19805, USA; Emails: [ab@auraband.io](mailto:ab@auraband.io); [sg@auraband.io](mailto:sg@auraband.io)

\*Correspondence to Dmitry M. Davydov, Laboratory of Neuroimmunopathology, Institute of General Pathology and Pathophysiology, Russian Academy of Sciences, 8 Baltiyskaia ul., Moscow, 125315, Russia; Phone: 7 (495) 496 5234; Fax: 7 (495) 601 2366; E-mail: [d.m.davydov@gmail.com](mailto:d.m.davydov@gmail.com)

**Table 1S.** Predicting main effects of segmental bioimpedance (BIA) measures on body weight, width, and length in percent to body weight. The t-statistic, p-value and 95% confidence interval (95% CI) of the predictions show, respectively, the likelihood that the effect is different from zero, the probability that the effect can purely be assigned to chance, and the effect precision/size. The Akaike Information Criterion (AIC) was used for model selection and AIC cells in bold are the best fitting significant models (i.e., smaller values of the AIC were preferred). Distance in formulas is an interval between pairs of electrodes: widths in segmental schema and body lengths in whole-body schema. <sup>1</sup> - measured by RLC analyser E7-25.

| Measures                       |                     |                       |                    |                                                                     | Weight                  |                         |                | Width                 |                       |                 | Length                |                           |                 |
|--------------------------------|---------------------|-----------------------|--------------------|---------------------------------------------------------------------|-------------------------|-------------------------|----------------|-----------------------|-----------------------|-----------------|-----------------------|---------------------------|-----------------|
| Name                           | Schema              | Obtained              | Symbol             | Equation                                                            | t(p)                    | 95% CI                  | AIC            | t(p)                  | 95% CI                | AIC             | t(p)                  | 95% CI                    | AIC             |
| Conductance module             | Parallel            | Measured <sup>1</sup> | $Y$                |                                                                     | NS                      |                         |                | -25.643 (0.0E0)       | -4.346 to -3.724      | 1375.778        | NS                    |                           |                 |
| Phase angle                    | Serial              | Measured <sup>1</sup> | $\phi$             |                                                                     | -3.723 (2.74E-4)        | -0.018 to -0.006        | -20.772        | -5.142 (7.95E-7)      | -0.709 to -0.316      | 1369.777        | -3.665 (3.37E-4)      | -1.951 to -0.584          | 1529.468        |
| Resistance                     | Serial              | Calculated            | $R$                | $(1/Y) * \cos(\phi)$                                                | NS                      |                         |                | -8.236 (6.33E-14)     | -10.089 to -6.186     | 1370.722        | NS                    |                           |                 |
| Reactance                      | Serial              | Calculated            | $Xc$               | $(1/Y) * \sin(\phi)$                                                | -2.293 (0.023)          | -0.220 to -0.016        | -15.543        | -3.843 (1.76E-4)      | -27.849 to -8.940     | 1361.901        | NS                    |                           |                 |
| Total body water               | Serial-Empirical    | Calculated            | TBW <sub>s</sub>   | $distance^2/R$                                                      | 4.177 (4.90E-5)         | 0.020 to 0.057          | -17.142        | 25.317 (0.0E0)        | 14.621 to 17.096      | 1144.44         | 3.169 (0.002)         | 1.615 to 6.961            | 1529.73         |
| Intra-cellular water (Inverse) | Serial-Empirical    | Calculated            | ICW <sub>s</sub>   | $distance^2/Xc$                                                     | 4.413 (1.90E-5)         | 0.013 to 0.033          | -18.635        | <b>34.350 (0.0E0)</b> | <b>7.708 to 8.649</b> | <b>1116.443</b> | 3.588 (4.45E-4)       | 1.125 to 3.881            | 1529.266        |
| Extra-cellular water           | Serial-Empirical    | Calculated            | ECW <sub>s</sub>   | $TBW_s - ICW_s$                                                     | -4.374 (2.20E-5)        | -0.069 to -0.026        | -21.961        | -20.569 (0.0E0)       | -13.294 to -10.964    | 1163.157        | NS                    |                           |                 |
| Intra-cellular water           | Serial              | Calculated            | ICW <sub>s2</sub>  | $Xc/R$                                                              | <b>-3.558 (4.93E-4)</b> | <b>-0.844 to -0.242</b> | <b>-27.896</b> | -5.082 (1.00E-6)      | -33.082 to -14.565    | 1362.953        | <b>-3.529 (0.001)</b> | <b>-88.356 to -24.944</b> | <b>1522.235</b> |
| Intra-cellular water           | Serial-Individual   | Calculated            | ICW <sub>is</sub>  | $Xc/distance$                                                       | -4.506 (1.30E-5)        | -0.030 to -0.012        | -12.744        | -2.626 (0.009)        | -6.159 to -0.871      | 1354.73         | -2.247 (0.026)        | -2.763 to -0.178          | 1534.259        |
| Extra-cellular water (Inverse) | Serial-Individual   | Calculated            | ECW <sub>is</sub>  | $R/distance$                                                        | -1.770 (0.079)          | -0.015 to 0.001         | -9.526         | -5.124 (8.630E-7)     | -7.158 to -3.175      | 1355.567        | NS                    |                           |                 |
| Total body water (Inverse)     | Serial-Individual   | Calculated            | TBW <sub>is</sub>  | $\sqrt{Xc^2 + R^2}$                                                 | NS                      |                         |                | -7.492 (4.52E-12)     | -9.389 to -5.471      | 1369.672        | NS                    |                           |                 |
| Resistance                     | Parallel            | Calculated            | $Rp$               | $(1/Y) / \cos(-\phi)$                                               | NS                      |                         |                | -6.028 (1.23E-8)      | -8.627 to -4.369      | 1369.041        | NS                    |                           |                 |
| Reactance                      | Parallel            | Calculated            | $Xcp$              | $(1/Y) / \sin(-\phi)$                                               | 2.459 (0.015)           | 0.004 to 0.037          | -11.961        | NS                    |                       |                 | 2.167 (0.032)         | 0.227 to 3.911            | 1532.939        |
| Total body water               | Parallel-Empirical  | Calculated            | TBW <sub>p</sub>   | $distance^2/Rp$                                                     | 4.331 (2.60E-5)         | 0.028 to 0.074          | -18.344        | 34.386 (0.0E0)        | 19.421 to 21.788      | 1124.429        | 3.361 (0.001)         | 2.333 to 8.983            | 1528.797        |
| Intra-cellular water (Inverse) | Parallel-Empirical  | Calculated            | ICW <sub>p</sub>   | $distance^2/Xcp$                                                    | 3.853 (1.69E-4)         | 0.042 to 0.129          | -17.572        | 19.241 (0.0E0)        | 33.293 to 40.909      | 1178.148        | 2.854 (0.005)         | 2.931 to 16.100           | 1528.842        |
| Extra-cellular water           | Parallel-Empirical  | Calculated            | ECW <sub>p</sub>   | $TBW_p - ICW_p$                                                     | 4.442 (1.70E-5)         | 0.062 to 0.161          | -21.399        | 27.081 (0.0E0)        | 37.924 to 43.891      | 1149.299        | NS                    |                           |                 |
| Intra-cellular water           | Parallel            | Calculated            | ICW <sub>p2</sub>  | $Xcp/Rp$                                                            | 3.840 (1.77E-4)         | 0.040 to 0.126          | -24.438        | 4.472 (1.50E-5)       | 1.612 to 4.161        | 1364.353        | 3.644 (3.63E-4)       | 4.096 to 13.789           | 1525.446        |
| Intra-cellular water           | Parallel-Individual | Calculated            | ICW <sub>ip</sub>  | $Xcp/distance$                                                      | NS                      |                         |                | -5.301 (3.819E-7)     | -2.617 to -1.196      | 1362.971        | NS                    |                           |                 |
| Extra-cellular water (Inverse) | Parallel-Individual | Calculated            | ECW <sub>ip</sub>  | $Rp/distance$                                                       | -2.791 (0.006)          | -0.012 to -0.002        | -9.814         | -3.592 (4.38E-4)      | -5.665 to -1.645      | 1359.407        | NS                    |                           |                 |
| Total body water (Inverse)     | Parallel-Individual | Calculated            | TBW <sub>ip</sub>  | $\sqrt{Xcp^2 + Rp^2}$                                               | 1.792 (0.075)           | -0.002 to 0.032         | -11.028        | NS                    |                       |                 | 1.806 (0.073)         | -0.188 to 4.206           | 1533.619        |
| Total body water (Inverse)     | Serial-Individual   | Calculated            | TBW <sub>is2</sub> | $(Xc * R) / \sqrt{Xc^2 + R^2}$                                      | NS                      |                         |                | -4.509 (1.30E-5)      | -32.720 to -12.786    | 1360.888        | NS                    |                           |                 |
| Total body water               | Serial-Empirical    | Calculated            | TBW <sub>s2</sub>  | $distance^2 / \sqrt{Xc^2 + R^2}$                                    | 4.263 (3.50E-5)         | 0.024 to 0.065          | -17.751        | 29.320 (0.0E0)        | 16.903 to 19.345      | 1133.06         | 3.270 (0.001)         | 1.954 to 7.917            | 1529.257        |
| Total body water (Inverse)     | Serial-Individual   | Calculated            | TBW <sub>is3</sub> | $\sqrt{ICW_{is}^2 + ECW_{is}^2}$                                    | -2.200 (0.029)          | -0.014 to -0.001        | -9.664         | -4.352 (2.40E-5)      | -6.391 to -2.401      | 1357.1          | NS                    |                           |                 |
| Total body water (Inverse)     | Parallel-Individual | Calculated            | TBW <sub>ip2</sub> | $\sqrt{ICW_{ip}^2 + ECW_{ip}^2}$                                    | NS                      |                         |                | -5.214 (5.71E-7)      | -2.337 to -1.053      | 1362.273        | NS                    |                           |                 |
| Total body water (Inverse)     | Serial-Individual   | Calculated            | TBW <sub>is4</sub> | $\frac{10 * (ICW_{is} * ECW_{is})}{\sqrt{ICW_{is}^2 + ECW_{is}^2}}$ | -3.661 (3.42E-4)        | -0.004 to -0.001        | -8.095         | -3.284 (0.001)        | -1.690 to -0.421      | 1360.144        | -2.022 (0.045)        | -0.333 to -0.004          | 1538.566        |
| Body Weight                    |                     | Measured              |                    |                                                                     |                         |                         |                | 5.368 (4.20E-5)       | 17.949 to 41.032      | 1348.041        | 5.961 (1.20E-5)       | 70.594 to 147.446         | 1353.887        |
| Body Width (average)           |                     | Measured              |                    |                                                                     | 7.116 (1.000E-6)        | 0.014 to 0.026          | -12.796        |                       |                       |                 |                       | 4.683 (1.850E-4)          | 1.318 to 3.464  |
| Body Length                    |                     | Measured              |                    |                                                                     | 7.778 (3.650E-7)        | 0.005 to 0.008          | -7.876         | 4.866 (1.240E-4)      | 0.114 to 0.287        | 1365.373        |                       |                           |                 |

**Table 2S.** Predicting main effects of segmental BIA measures on body water/moisture, proteins, and ash/minerals in percent to body weight. See explanation of abbreviations and marks in legend to Table 1S.

| Measures                       |                     |                       |                    |                                                                     | Moisture              |                         |                | Proteins             |                       |                | Ash                   |                         |                |
|--------------------------------|---------------------|-----------------------|--------------------|---------------------------------------------------------------------|-----------------------|-------------------------|----------------|----------------------|-----------------------|----------------|-----------------------|-------------------------|----------------|
| Name                           | Schema              | Obtained              | Symbol             | Equation                                                            | t(p)                  | 95% CI                  | AIC            | t(p)                 | 95% CI                | AIC            | t(p)                  | 95% CI                  | AIC            |
| Conductance module             | Parallel            | Measured <sup>1</sup> | $Y$                |                                                                     | NS                    |                         |                | NS                   |                       |                | NS                    |                         |                |
| Phase angle                    | Serial              | Measured <sup>1</sup> | $\phi$             |                                                                     | -1.888 (0.061)        | -0.207 to 0.005         | 862.961        | NS                   |                       |                | -2.583 (0.011)        | -0.017 to -0.002        | -53.604        |
| Resistance                     | Serial              | Calculated            | $R$                | $(1/Y) * \cos(\phi)$                                                | -1.729 (0.086)        | -1.444 to 0.096         | 860.485        | 1.831 (0.069)        | -0.014 to 0.383       | 478.372        | NS                    |                         |                |
| Reactance                      | Serial              | Calculated            | $Xc$               | $(1/Y) * \sin(\phi)$                                                | -3.312 (0.001)        | -3.282 to -0.830        | 857.459        | NS                   |                       |                | NS                    |                         |                |
| Total body water               | Serial-Empirical    | Calculated            | TBW <sub>s</sub>   | $distance^2/R$                                                      | NS                    |                         |                | NS                   |                       |                | NS                    |                         |                |
| Intra-cellular water (Inverse) | Serial-Empirical    | Calculated            | ICW <sub>s</sub>   | $distance^2/Xc$                                                     | NS                    |                         |                | NS                   |                       |                | 1.764 (0.080)         | -0.001 to 0.017         | -44.804        |
| Extra-cellular water           | Serial-Empirical    | Calculated            | ECW <sub>s</sub>   | TBW <sub>s</sub> - ICW <sub>s</sub>                                 | NS                    |                         |                | NS                   |                       |                | NS                    |                         |                |
| Intra-cellular water           | Serial              | Calculated            | ICW <sub>s2</sub>  | $Xc/R$                                                              | <b>-2.088 (0.038)</b> | <b>-9.918 to -0.276</b> | <b>854.478</b> | NS                   |                       |                | <b>-2.692 (0.008)</b> | <b>-0.801 to -0.123</b> | <b>-62.263</b> |
| Intra-cellular water           | Serial-Individual   | Calculated            | ICW <sub>is</sub>  | $Xc/distance$                                                       | -4.522 (1.2E-5)       | -0.378 to -0.148        | 861.999        | NS                   |                       |                | -3.354 (0.001)        | -0.023 to -0.006        | -46.079        |
| Extra-cellular water (Inverse) | Serial-Individual   | Calculated            | ECW <sub>is</sub>  | $R/distance$                                                        | -2.780 (0.006)        | -0.219 to -0.037        | 863.731        | <b>2.077 (0.039)</b> | <b>0.001 to 0.059</b> | <b>481.980</b> | NS                    |                         |                |
| Total body water (Inverse)     | Serial-Individual   | Calculated            | TBW <sub>is</sub>  | $\sqrt{Xc^2 + R^2}$                                                 | -2.133 (0.034)        | -1.357 to -0.052        | 860.332        | 1.706 (0.090)        | -0.024 to 0.323       | 478.747        | NS                    |                         |                |
| Resistance                     | Parallel            | Calculated            | R <sub>p</sub>     | $(1/Y) / \cos(-\phi)$                                               | -2.596 (0.010)        | -1.234 to -0.168        | 860.163        | NS                   |                       |                | NS                    |                         |                |
| Reactance                      | Parallel            | Calculated            | X <sub>cp</sub>    | $(1/Y) / \sin(-\phi)$                                               | NS                    |                         |                | 1.942 (0.054)        | -0.001 to 0.163       | 479.966        | NS                    |                         |                |
| Total body water               | Parallel-Empirical  | Calculated            | TBW <sub>p</sub>   | $distance^2/R_p$                                                    | NS                    |                         |                | NS                   |                       |                | NS                    |                         |                |
| Intra-cellular water (Inverse) | Parallel-Empirical  | Calculated            | ICW <sub>p</sub>   | $distance^2/X_{cp}$                                                 | NS                    |                         |                | NS                   |                       |                | NS                    |                         |                |
| Extra-cellular water           | Parallel-Empirical  | Calculated            | ECW <sub>p</sub>   | TBW <sub>p</sub> - ICW <sub>p</sub>                                 | NS                    |                         |                | NS                   |                       |                | NS                    |                         |                |
| Intra-cellular water           | Parallel            | Calculated            | ICW <sub>p2</sub>  | $X_{cp}/R_p$                                                        | NS                    |                         |                | NS                   |                       |                | 1.700 (0.091)         | -0.008 to 0.110         | -50.133        |
| Intra-cellular water           | Parallel-Individual | Calculated            | ICW <sub>ip</sub>  | $X_{cp}/distance$                                                   | -2.065 (0.041)        | -0.089 to -0.002        | 865.841        | 2.664 (0.009)        | 0.004 to 0.026        | 483.392        | NS                    |                         |                |
| Extra-cellular water (Inverse) | Parallel-Individual | Calculated            | ECW <sub>ip</sub>  | $R_p/distance$                                                      | -3.945 (1.20E-4)      | -0.161 to -0.054        | 863.922        | 1.738 (0.084)        | -0.002 to 0.039       | 482.854        | -2.154 (0.033)        | -0.010 to -4.22E-4      | -43.733        |
| Total body water (Inverse)     | Parallel-Individual | Calculated            | TBW <sub>ip</sub>  | $\sqrt{X_{cp}^2 + R_p^2}$                                           | NS                    |                         |                | 1.940 (0.054)        | -0.001 to 0.143       | 480.251        | NS                    |                         |                |
| Total body water (Inverse)     | Serial-Individual   | Calculated            | TBW <sub>is2</sub> | $(Xc * R) / \sqrt{Xc^2 + R^2}$                                      | -3.091 (0.002)        | -3.720 to -0.819        | 857.547        | NS                   |                       |                | NS                    |                         |                |
| Total body water               | Serial-Empirical    | Calculated            | TBW <sub>s2</sub>  | $distance^2 / \sqrt{Xc^2 + R^2}$                                    | NS                    |                         |                | NS                   |                       |                | NS                    |                         |                |
| Total body water (Inverse)     | Serial-Individual   | Calculated            | TBW <sub>is3</sub> | $\sqrt{ICW_{is}^2 + ECW_{is}^2}$                                    | -3.330 (0.001)        | -0.190 to -0.049        | 863.807        | 1.900 (0.059)        | -0.001 to 0.049       | 482.400        | -1.681 (0.095)        | -0.011 to 0.001         | -43.709        |
| Total body water (Inverse)     | Parallel-Individual | Calculated            | TBW <sub>ip2</sub> | $\sqrt{ICW_{ip}^2 + ECW_{ip}^2}$                                    | -2.452 (0.015)        | -0.079 to -0.009        | 865.884        | 2.471 (0.015)        | 0.002 to 0.022        | 483.777        | NS                    |                         |                |
| Total body water (Inverse)     | Serial-Individual   | Calculated            | TBW <sub>is4</sub> | $\frac{10 * (ICW_{is} * ECW_{is})}{\sqrt{ICW_{is}^2 + ECW_{is}^2}}$ | -4.195 (4.5E-5)       | -0.045 to -0.016        | 866.402        | NS                   |                       |                | -2.568 (0.011)        | -0.003 to -3.63E-4      | -41.467        |
| Body Weight                    |                     | Measured              |                    |                                                                     | NS                    |                         |                | NS                   |                       |                | 1.838 (0.083)         | -0.039 to 0.587         | -63.481        |
| Body Width (average)           |                     | Measured              |                    |                                                                     | NS                    |                         |                | NS                   |                       |                | 1.820 (0.085)         | -0.001 to 0.016         | -40.319        |
| Body Length                    |                     | Measured              |                    |                                                                     | 1.852 (0.080)         | -0.006 to 0.089         | 849.371        | NS                   |                       |                | 2.311 (0.033)         | 2.110E-4 to 0.004       | -58.134        |

**Table 3S.** Predicting two- and three-factor simple and interaction effects of segmental BIA measures on body water/moisture, proteins, and ash/minerals in percent to body weight. See explanation of abbreviations and marks in legend to Table 1S.

| Measures             |                                  | Moisture          |                  |                 | Proteins             |                                  |                   |                  |          | Ash                  |                                  |                |                     |                |
|----------------------|----------------------------------|-------------------|------------------|-----------------|----------------------|----------------------------------|-------------------|------------------|----------|----------------------|----------------------------------|----------------|---------------------|----------------|
| Models               | Symbols                          | t(p)              | 95% CI           | AIC             | Models               | Symbols                          | t(p)              | 95% CI           | AIC      | Models               | Symbols                          | t(p)           | 95% CI              | AIC            |
| <i>Model 1</i>       |                                  |                   |                  | 864.956         | <i>Model 1</i>       |                                  |                   |                  | 487.4253 | <i>Model 1</i>       |                                  |                |                     | -60.371        |
| Conductance module   | <i>Y</i>                         | 1.666 (0.098)     | -0.017 to 0.197  |                 | Intra-cellular water | ICWis                            | -2.315 (0.022)    | -1.094 to -0.087 |          | Phase angle          | $\phi$                           | -2.593 (0.010) | -0.013 to -0.002    |                |
| Phase angle          | $\phi$                           | -2.091 (0.038)    | -0.227 to -0.006 |                 | Extra-cellular water | ECWis                            | 2.558 (0.011)     | 0.048 to 0.371   |          | Body Weight          | <i>Wt</i>                        | 1.668 (0.097)  | -0.042 to 0.493     |                |
| <i>Model 2</i>       |                                  |                   |                  | 847.0097        | <i>Model 2</i>       |                                  |                   |                  | 490.4123 | <i>Model 2</i>       |                                  |                |                     | -56.907        |
| Resistance           | <i>R</i>                         | -2.670 (0.008)    | -1.339 to -0.200 |                 | Intra-cellular water | ICWis                            | -1.724 (0.087)    | -0.892 to 0.061  |          | Body Weight          | <i>Wt</i>                        | 1.814 (0.072)  | -0.024 to 0.554     |                |
| Body Length          | <i>L</i>                         | 1.889 (0.061)     | -0.002 to 0.086  |                 | Extra-cellular water | ECWis                            | 1.917 (0.057)     | -0.005 to 0.314  |          | <b>Model 3</b>       |                                  |                |                     | <b>-68.891</b> |
| Resistance           | <i>R<sub>p</sub></i>             | -3.600 (4.270E-4) | -1.064 to -0.310 |                 | Interaction          | ICWis*ECWis                      | 1.979 (0.050)     | 2.99E-5 to 0.032 |          | Intra-cellular water | ICWs2                            | -2.701 (0.008) | -0.616 to -0.096    |                |
| Body Length          | <i>L</i>                         | 1.880 (0.062)     | -0.002 to 0.086  |                 | Body Length          | <i>L</i>                         | 0.993 (0.332)     | -0.007 to 0.022  |          | Body Weight          | <i>Wt</i>                        | 1.654 (0.100)  | -0.043 to 0.490     |                |
| <b>Model 4</b>       |                                  |                   |                  | <b>844.9813</b> | <i>Model 3</i>       |                                  |                   |                  | 495.4253 | <i>Model 4</i>       |                                  |                |                     | -52.504        |
| Reactance            | <i>X<sub>c</sub></i>             | -4.159 (5.200E-5) | -2.583 to -0.919 |                 | Intra-cellular water | ICWip                            | 2.158 (0.032)     | 0.004 to 0.087   |          | Total body water     | TBW <sub>s4</sub>                | -2.425 (0.016) | -0.002 to -1.740E-4 |                |
| Body Length          | <i>L</i>                         | 1.854 (0.066)     | -0.003 to 0.085  |                 | Extra-cellular water | ECWip                            | -2.334 (0.021)    | -0.253 to -0.021 |          | Body Weight          | <i>Wt</i>                        | 1.822 (0.070)  | -0.022 to 0.557     |                |
| <i>Model 5</i>       |                                  |                   |                  | 849.0913        | <i>Model 4</i>       |                                  |                   |                  | 498.0291 | <i>Model 5</i>       |                                  |                |                     | -45.9085       |
| Reactance            | <i>X<sub>c<sub>p</sub></sub></i> | -2.110 (0.036)    | -0.522 to -0.017 |                 | Interaction          | ICWip*ECWip                      | 2.617 (0.010)     | 0.001 to 0.005   |          | Conductance module   | <i>/Y/</i>                       | 2.110 (0.036)  | 3.340E-4 to 0.10    |                |
| Body Length          | <i>L</i>                         | 1.927 (0.056)     | -0.001 to 0.087  |                 | Intra-cellular water | ICWip                            | 1.423 (0.157)     | -0.012 to 0.072  |          | Phase angle          | $\phi$                           | -2.855 (0.005) | -0.018 to -0.003    |                |
| <i>Model 6</i>       |                                  |                   |                  | 849.6587        | <i>Model 6</i>       |                                  |                   |                  |          | <i>Model 6</i>       |                                  |                |                     | -52.175        |
| Intra-cellular water | ICWis                            | -5.168 (7.104E-7) | -0.283 to -0.126 |                 | Extra-cellular water | ECWip                            | -1.829 (0.069)    | -0.192 to 0.007  |          | Conductance module   | <i>/Y/</i>                       | 1.794 (0.075)  | -3.850E-4 to 0.008  |                |
| Body Length          | <i>L</i>                         | 1.837 (0.068)     | -0.003 to 0.085  |                 | Interaction          | ICWip*ECWip                      | 2.904 (0.004)     | 0.001 to 0.004   |          | Phase angle          | $\phi$                           | -2.804 (0.006) | -0.014 to -0.002    |                |
| <i>Model 7</i>       |                                  |                   |                  | 852.6848        | <i>Model 5</i>       |                                  |                   |                  | 485.2908 | <i>Model 7</i>       |                                  |                |                     | -54.263        |
| Intra-cellular water | ICW <sub>ip</sub>                | -2.507 (0.013)    | -0.082 to -0.010 |                 | Total body water     | TBW <sub>ip2</sub>               | 2.450 (0.015)     | 0.002 to 0.023   |          | Body Weight          | <i>Wt</i>                        | 1.620 (0.107)  | -0.049 to 0.491     |                |
| Body Length          | <i>L</i>                         | 1.872 (0.063)     | -0.002 to 0.086  |                 | Body Length          | <i>L</i>                         | 1.090 (0.277)     | -0.007 to 0.023  |          | Resistance           | <i>R</i>                         | 3.511 (0.001)  | 0.113 to 0.404      |                |
| <i>Model 8</i>       |                                  |                   |                  | 850.951         | <i>Model 8</i>       |                                  |                   |                  |          | <i>Model 8</i>       |                                  |                |                     | -61.185        |
| Extra-cellular water | ECWis                            | -2.897 (0.004)    | -0.185 to -0.035 |                 | Reactance            | <i>X<sub>c</sub></i>             | -4.024 (8.900E-5) | -0.744 to -0.254 |          | Resistance           | <i>R</i>                         | 2.720 (0.007)  | 0.049 to 0.310      |                |
| Body Length          | <i>L</i>                         | 1.853 (0.066)     | -0.003 to 0.086  |                 | Reactance            | <i>X<sub>c</sub></i>             | -2.857 (0.005)    | -0.579 to -0.106 |          | Body Weight          | <i>Wt</i>                        | 1.618 (0.108)  | -0.051 to 0.512     |                |
| <i>Model 9</i>       |                                  |                   |                  | 851.3468        | <i>Model 9</i>       |                                  |                   |                  |          | <i>Model 9</i>       |                                  |                |                     | -47.1814       |
| Extra-cellular water | ECW <sub>ip</sub>                | -4.142 (5.60E-5)  | -0.131 to -0.046 |                 | Resistance           | <i>R<sub>p</sub></i>             | -2.886 (0.004)    | -0.259 to -0.048 |          | Reactance            | <i>X<sub>c<sub>p</sub></sub></i> | 2.436 (0.016)  | 0.014 to 0.133      |                |
| Body Length          | <i>L</i>                         | 1.846 (0.067)     | -0.003 to 0.085  |                 | Reactance            | <i>X<sub>c<sub>p</sub></sub></i> | 2.436 (0.016)     | 0.014 to 0.133   |          | <i>Model 10</i>      |                                  |                |                     | -54.702        |
| <i>Model 10</i>      |                                  |                   |                  | 846.9854        | <i>Model 11</i>      |                                  |                   |                  |          | <i>Model 10</i>      |                                  |                |                     | -54.702        |
| Total body water     | TBW <sub>is</sub>                | -3.122 (0.002)    | -1.205 to -0.271 |                 | Resistance           | <i>R<sub>p</sub></i>             | -2.257 (0.025)    | -0.163 to -0.011 |          | Resistance           | <i>R<sub>p</sub></i>             | -2.257 (0.025) | -0.163 to -0.011    |                |
| Body Length          | <i>L</i>                         | 1.885 (0.061)     | -0.002 to 0.086  |                 | Reactance            | <i>X<sub>c<sub>p</sub></sub></i> | 1.883 (0.061)     | -0.002 to 0.085  |          | Reactance            | <i>X<sub>c<sub>p</sub></sub></i> | 1.883 (0.061)  | -0.002 to 0.085     |                |
| <i>Model 11</i>      |                                  |                   |                  | 851.1288        | <i>Model 12</i>      |                                  |                   |                  |          | <i>Model 11</i>      |                                  |                |                     | -46.3861       |
| Total body water     | TBW <sub>is3</sub>               | -3.480 (0.001)    | -0.157 to -0.043 |                 | Body Weight          | <i>Wt</i>                        | 1.720 (0.087)     | -0.036 to 0.518  |          | Body Weight          | <i>Wt</i>                        | 1.720 (0.087)  | -0.036 to 0.518     |                |
| Body Length          | <i>L</i>                         | 1.849 (0.066)     | -0.003 to 0.086  |                 | <b>Model 12</b>      |                                  |                   |                  |          | <i>Model 12</i>      |                                  |                |                     | -55.21         |
| Total body water     | TBW <sub>is2</sub>               | -4.215 (4.200E-5) | -2.920 to -1.057 |                 | Total body water     | TBW <sub>s</sub>                 | -2.115 (0.036)    | -0.240 to -0.008 |          | Intra-cellular water | ICW <sub>s</sub>                 | 2.438 (0.016)  | 0.013 to 0.123      |                |
| Body Length          | <i>L</i>                         | 1.861 (0.065)     | -0.003 to 0.085  |                 | Body Length          | <i>L</i>                         | 1.861 (0.065)     | -0.003 to 0.085  |          | Total body water     | TBW <sub>s</sub>                 | -2.115 (0.036) | -0.240 to -0.008    |                |
| <i>Model 13</i>      |                                  |                   |                  | 852.8275        | <i>Model 13</i>      |                                  |                   |                  |          | <i>Model 13</i>      |                                  |                |                     | -55.21         |
| Total body water     | TBW <sub>ip2</sub>               | -2.854 (0.005)    | -0.072 to -0.013 |                 | Intra-cellular water | ICW <sub>s</sub>                 | 2.070 (0.040)     | 0.002 to 0.101   |          | Intra-cellular water | ICW <sub>s</sub>                 | 2.070 (0.040)  | 0.002 to 0.101      |                |

|                  |                    |                  |                  |          |
|------------------|--------------------|------------------|------------------|----------|
| Body Length      | <i>L</i>           | 1.868 (0.064)    | -0.002 to 0.086  |          |
| <i>Model 14</i>  |                    |                  |                  | 853.9819 |
| Total body water | TBW <sub>is4</sub> | -4.640 (7.00E-6) | -0.034 to -0.014 |          |
| Body Length      | <i>L</i>           | 1.840 (0.068)    | -0.003 to 0.085  |          |

|                      |                   |                |                  |          |
|----------------------|-------------------|----------------|------------------|----------|
| Total body water     | TBW <sub>s</sub>  | -1.866 (0.064) | -0.210 to 0.006  |          |
| Body Weight          | <i>Wt</i>         | 1.714 (0.088)  | -0.038 to 0.539  |          |
| <i>Model 13</i>      |                   |                |                  | -51.0932 |
| Intra-cellular water | ICW <sub>p</sub>  | -2.372 (0.019) | -0.719 to -0.066 |          |
| Total body water     | TBW <sub>p</sub>  | 2.683 (0.008)  | 0.056 to 0.370   |          |
| <i>Model 14</i>      |                   |                |                  | -60.351  |
| Intra-cellular water | ICW <sub>p</sub>  | -2.100 (0.037) | -0.633 to -0.019 |          |
| Total body water     | TBW <sub>p</sub>  | 2.305 (0.023)  | 0.024 to 0.309   |          |
| Body Weight          | <i>Wt</i>         | 1.738 (0.084)  | -0.035 to 0.540  |          |
| <i>Model 15</i>      |                   |                |                  | -42.4787 |
| Intra-cellular water | ICW <sub>is</sub> | -2.732 (0.007) | -0.102 to -0.016 |          |
| Extra-cellular water | ECW <sub>is</sub> | 1.928 (0.056)  | -0.001 to 0.059  |          |
| <i>Model 16</i>      |                   |                |                  | -51.867  |
| Intra-cellular water | ICW <sub>is</sub> | -2.117 (0.036) | -0.076 to -0.003 |          |
| Extra-cellular water | ECW <sub>is</sub> | 1.555 (0.122)  | -0.005 to 0.045  |          |
| Body Weight          | <i>Wt</i>         | 1.750 (0.082)  | -0.033 to 0.540  |          |

---

**Table 4S.** Predicting main effects of whole-body BIA measures on body weight and length. See explanation of abbreviations and marks in legend to Table 1S.

| Measures                       |                     |            | Weight             |                         |                         |                | Length                  |                          |                |  |
|--------------------------------|---------------------|------------|--------------------|-------------------------|-------------------------|----------------|-------------------------|--------------------------|----------------|--|
| Name                           | Schema              | Obtained   | Symbol             | t(p)                    | 95% CI                  | AIC            | t(p)                    | 95% CI                   | AIC            |  |
| Conductance module             | Parallel            | Measured   | $Y$                | 1.908 (0.064)           | -0.003 to 0.095         | 2.603          | 1.723 (0.093)           | -0.693 to 8.623          | 354.169        |  |
| Phase angle                    | Parallel            | Measured   | $\phi$             | NS                      |                         |                | NS                      |                          |                |  |
| Resistance                     | Serial              | Calculated | $R$                | -1.763 (0.086)          | -0.313 to 0.022         | 0.193          | NS                      |                          |                |  |
| Reactance                      | Serial              | Calculated | $X_c$              | -3.952 (3.26E-4)        | -0.475 to -0.153        | -2.279         | -3.475 (0.001)          | -60.651 to -15.999       | 347.627        |  |
| Total body water               | Serial-Empirical    | Calculated | TBW <sub>s</sub>   | 3.720 (0.001)           | 0.013 to 0.043          | -4.421         | 4.142 (1.85E-4)         | 1.650 to 4.805           | 343.893        |  |
| Intra-cellular water (Inverse) | Serial-Empirical    | Calculated | ICW <sub>s</sub>   | 3.097 (0.004)           | 0.002 to 0.011          | 3.024          | 3.315 (0.002)           | 0.288 to 1.190           | 353.593        |  |
| Extra-cellular water           | Serial-Empirical    | Calculated | ECW <sub>s</sub>   | -2.822 (0.008)          | -0.014 to -0.002        | 4.425          | -3.065 (0.004)          | -1.406 to -0.257         | 355.56         |  |
| Intra-cellular water           | Serial              | Calculated | ICW <sub>s2</sub>  | NS                      |                         |                | -1.730 (0.092)          | -90.055 to 7.073         | 349.727        |  |
| Intra-cellular water           | Serial-Individual   | Calculated | ICW <sub>is</sub>  | -6.844 (4.004E-8)       | -0.832 to -0.452        | -5.497         | -9.230 (3.016E-11)      | -97.695 to -62.549       | 342.661        |  |
| Extra-cellular water (Inverse) | Serial-Individual   | Calculated | ECW <sub>is</sub>  | -3.569 (0.001)          | -0.726 to -0.201        | 0.036          | -3.416 (0.002)          | -89.326 to -22.852       | 344.171        |  |
| Total body water (Inverse)     | Serial-Individual   | Calculated | TBW <sub>is</sub>  | -2.111 (0.041)          | -0.277 to -0.006        | -4.685         | -1.851 (0.072)          | -35.008 to 1.569         | 350.64         |  |
| Resistance                     | Parallel            | Calculated | $R_p$              | -2.601 (0.013)          | -0.232 to -0.029        | -0.086         | -2.299 (0.027)          | -29.842 to -1.893        | 350.154        |  |
| Reactance                      | Parallel            | Calculated | $X_{c_p}$          | NS                      |                         |                | NS                      |                          |                |  |
| Total body water               | Parallel-Empirical  | Calculated | TBW <sub>p</sub>   | 3.530 (0.001)           | 0.012 to 0.046          | -3.295         | 3.865 (4.21E-4)         | 1.572 to 5.031           | 345.457        |  |
| Intra-cellular water (Inverse) | Parallel-Empirical  | Calculated | ICW <sub>p</sub>   | 4.223 (1.45E-4)         | 0.050 to 0.142          | -9.89          | <b>4.671 (3.70E-5)</b>  | <b>6.460 to 16.344</b>   | <b>336.237</b> |  |
| Extra-cellular water           | Parallel-Empirical  | Calculated | ECW <sub>p</sub>   | -3.741 (0.001)          | -0.036 to -0.011        | -4.192         | -4.193 (1.520E-4)       | -4.012 to -1.399         | 343.855        |  |
| Intra-cellular water           | Parallel            | Calculated | ICW <sub>p2</sub>  | NS                      |                         |                | NS                      |                          |                |  |
| Intra-cellular water           | Parallel-Individual | Calculated | ICW <sub>ip</sub>  | -2.149 (0.038)          | -0.388 to -0.012        | -2.896         | -2.333 (0.025)          | -45.873 to -3.252        | 345.527        |  |
| Extra-cellular water (Inverse) | Parallel-Individual | Calculated | ECW <sub>ip</sub>  | <b>-5.667 (2.00E-6)</b> | <b>-4.291 to -2.032</b> | <b>-8.894</b>  | -6.102 (4.123E-7)       | -523.851 to -262.859     | 339.182        |  |
| Total body water (Inverse)     | Parallel-Individual | Calculated | TBW <sub>ip</sub>  | NS                      |                         |                | NS                      |                          |                |  |
| Total body water (Inverse)     | Serial-Individual   | Calculated | TBW <sub>is2</sub> | -3.232 (0.003)          | -0.593 to -0.136        | -2.299         | -2.678 (0.011)          | -76.040 to -10.568       | 348.037        |  |
| Total body water               | Serial-Empirical    | Calculated | TBW <sub>s2</sub>  | 3.623 (0.001)           | 0.013 to 0.045          | -3.863         | 3.995 (2.87E-4)         | 1.610 to 4.919           | 344.662        |  |
| Total body water (Inverse)     | Serial-Individual   | Calculated | TBW <sub>is3</sub> | -4.578 (4.90E-5)        | -0.559 to -0.216        | -4.566         | -4.537 (5.60E-5)        | -68.908 to -26.388       | 343.872        |  |
| Total body water (Inverse)     | Parallel-Individual | Calculated | TBW <sub>ip2</sub> | -2.600 (0.013)          | -0.313 to -0.039        | -3.047         | -2.790 (0.008)          | -37.481 to -5.961        | 345.013        |  |
| Total body water (Inverse)     | Serial-Individual   | Calculated | TBW <sub>is4</sub> | -6.431 (1.462E-7)       | -0.106 to -0.055        | -1.32          | -7.451 (6.079E-9)       | -12.672 to -7.257        | 347.153        |  |
| Body Weight                    |                     | Measured   |                    |                         |                         |                | <b>5.961 (6.448E-7)</b> | <b>71.993 to 146.046</b> | <b>329.944</b> |  |
| Body Width (average)           |                     | Measured   |                    | <b>6.874 (3.644E-8)</b> | <b>0.023 to 0.042</b>   | <b>-36.399</b> | 4.252 (1.330E-4)        | 1.894 to 5.336           | 353.369        |  |
| Body Length                    |                     | Measured   |                    | 7.778 (2.234E-9)        | 0.005 to 0.008          | -31.792        |                         |                          |                |  |

**Table 5S.** Predicting main effects of whole-body BIA measures on body water/moisture, proteins, ash/minerals in percent to body weight, and well-being (K). See explanation of abbreviations and marks in legend to Table 1S.

| Electrical measures            |                     |                       | Moisture            |                      |                       |                | Proteins              |                          |                | Ash                   |                         |               | K                       |                         |               |
|--------------------------------|---------------------|-----------------------|---------------------|----------------------|-----------------------|----------------|-----------------------|--------------------------|----------------|-----------------------|-------------------------|---------------|-------------------------|-------------------------|---------------|
| Name                           | Schema              | Obtained              | Symbol              | t(p)                 | 95% CI                | AIC            | t(p)                  | 95% CI                   | AIC            | t(p)                  | 95% CI                  | AIC           | t(p)                    | 95% CI                  | AIC           |
| Conductance module             | Parallel            | Measured <sup>1</sup> | $Y$                 | NS                   |                       |                | NS                    |                          |                | NS                    |                         |               | NS                      |                         |               |
| Phase angle                    | Parallel            | Measured <sup>1</sup> | $\phi$              | NS                   |                       |                | -4.169 (1.70E-4)      | -0.096 to -0.033         | 122.407        | -2.422 (0.020)        | -0.019 to -0.002        | -3.418        | 2.489 (0.017)           | 0.003 to 0.033          | 53.569        |
| Resistance                     | Serial              | Calculated            | $R$                 | NS                   |                       |                | NS                    |                          |                | NS                    |                         |               | NS                      |                         |               |
| Reactance                      | Serial              | Calculated            | $X_c$               | NS                   |                       |                | -2.955 (0.005)        | -2.165 to -0.405         | 116.746        | -3.118 (0.003)        | -0.288 to -0.061        | -8.626        | <b>3.828 (4.69E-4)</b>  | <b>0.218 to 0.708</b>   | <b>46.875</b> |
| Total body water               | Serial-Empirical    | Calculated            | TBW <sub>s</sub>    | 1.982 (0.055)        | -0.004 to 0.400       | 214.956        | NS                    |                          |                | 1.744 (0.089)         | -0.001 to 0.020         | -2.796        | NS                      |                         |               |
| Intra-cellular water (Inverse) | Serial-Empirical    | Calculated            | ICW <sub>s</sub>    | 2.104 (0.042)        | -0.002 to -0.103      | 217.928        | NS                    |                          |                | 2.260 (0.030)         | 3.46E-4 to 0.006        | -0.831        | NS                      |                         |               |
| Extra-cellular water           | Serial-Empirical    | Calculated            | ECW <sub>s</sub>    | -1.991 (0.054)       | -0.128 to 0.001       | 217.590        | NS                    |                          |                | -2.379 (0.022)        | -0.009 to -0.001        | -1.538        | NS                      |                         |               |
| Intra-cellular water           | Serial              | Calculated            | ICW <sub>s2</sub>   | NS                   |                       |                | -4.531 (5.70E-5)      | -4.387 to -1.678         | 114.392        | -2.603 (0.013)        | -0.866 to -0.108        | -11.27        | 3.049 (0.004)           | 0.311 to 1.539          | 45.523        |
| Intra-cellular water           | Serial-Individual   | Calculated            | ICW <sub>i</sub>    | NS                   |                       |                | -4.605 (4.50E-5)      | -3.156 to -1.228         | 115.458        | -2.780 (0.008)        | -0.513 to -0.081        | -9.714        | 5.297 (5.00E-6)         | 0.535 to 1.198          | 45.172        |
| Extra-cellular water (Inverse) | Serial-Individual   | Calculated            | ECW <sub>i</sub>    | NS                   |                       |                | NS                    |                          |                | -2.039 (0.048)        | -0.352 to -0.001        | -8.625        | 1.958 (0.058)           | -0.016 to 0.985         | 46.927        |
| Total body water (Inverse)     | Serial-Individual   | Calculated            | TBW <sub>i</sub>    | NS                   |                       |                | NS                    |                          |                | -1.933 (0.061)        | -0.143 to 0.003         | -6.870        | NS                      |                         |               |
| Resistance                     | Parallel            | Calculated            | $R_p$               | NS                   |                       |                | NS                    |                          |                | -2.660 (0.011)        | -0.118 to -0.016        | -6.703        | 2.223 (0.032)           | 0.016 to 0.335          | 49.058        |
| Reactance                      | Parallel            | Calculated            | $X_{c_p}$           | NS                   |                       |                | NS                    |                          |                | NS                    |                         |               | NS                      |                         |               |
| Total body water               | Parallel-Empirical  | Calculated            | TBW <sub>p</sub>    | <b>2.217 (0.033)</b> | <b>0.020 to 0.441</b> | <b>214.518</b> | NS                    |                          |                | 2.060 (0.046)         | 1.99E-4 to 0.023        | -3.346        | NS                      |                         |               |
| Intra-cellular water (Inverse) | Parallel-Empirical  | Calculated            | ICW <sub>p</sub>    | NS                   |                       |                | NS                    |                          |                | NS                    |                         |               | NS                      |                         |               |
| Extra-cellular water           | Parallel-Empirical  | Calculated            | ECW <sub>p</sub>    | -2.073 (0.045)       | -0.342 to -0.004      | 215.079        | NS                    |                          |                | -1.814 (0.078)        | -0.017 to 0.001         | -2.537        | NS                      |                         |               |
| Intra-cellular water           | Parallel            | Calculated            | ICW <sub>p2</sub>   | NS                   |                       |                | 1.867 (0.070)         | -0.030 to 0.741          | 120.049        | NS                    |                         |               | NS                      |                         |               |
| Intra-cellular water           | Parallel-Individual | Calculated            | ICW <sub>i_p</sub>  | NS                   |                       |                | NS                    |                          |                | NS                    |                         |               | NS                      |                         |               |
| Extra-cellular water (Inverse) | Parallel-Individual | Calculated            | ECW <sub>i_p</sub>  | NS                   |                       |                | <b>-2.449 (0.019)</b> | <b>-16.791 to -1.593</b> | <b>112.987</b> | <b>-2.917 (0.006)</b> | <b>-2.261 to -0.408</b> | <b>-12.68</b> | 3.639 (0.001)           | 1.720 to 6.033          | 42.415        |
| Total body water (Inverse)     | Parallel-Individual | Calculated            | TBW <sub>i_p</sub>  | NS                   |                       |                | NS                    |                          |                | NS                    |                         |               | NS                      |                         |               |
| Total body water (Inverse)     | Serial-Individual   | Calculated            | TBW <sub>i</sub> s2 | NS                   |                       |                | -2.173 (0.036)        | -2.769 to -0.098         | 116.778        | -3.321 (0.002)        | -0.324 to -0.079        | -8.888        | <b>2.903 (0.006)</b>    | <b>0.155 to 0.869</b>   | <b>46.847</b> |
| Total body water               | Serial-Empirical    | Calculated            | TBW <sub>s</sub> 2  | 2.119 (0.041)        | 0.010 to 0.421        | 214.700        | NS                    |                          |                | 1.915 (0.063)         | -0.001 to 0.021         | -3.092        | NS                      |                         |               |
| Total body water (Inverse)     | Serial-Individual   | Calculated            | TBW <sub>i</sub> s3 | NS                   |                       |                | -1.739 (0.090)        | -2.196 to 0.167          | 117.585        | -2.593 (0.013)        | -0.279 to -0.034        | -8.379        | 2.684 (0.011)           | 0.109 to 0.777          | 46.942        |
| Total body water (Inverse)     | Parallel-Individual | Calculated            | TBW <sub>i</sub> p2 | NS                   |                       |                | NS                    |                          |                | NS                    |                         |               | NS                      |                         |               |
| Total body water (Inverse)     | Serial-Individual   | Calculated            | TBW <sub>i</sub> s4 | NS                   |                       |                | -3.486 (0.001)        | -0.410 to -0.109         | 119.936        | -2.969 (0.005)        | -0.061 to -0.012        | -5.505        | 4.624 (4.30E-5)         | 0.058 to 0.150          | 49.583        |
| Body Weight                    |                     | Measured              |                     | NS                   |                       |                | NS                    |                          |                | 1.838 (0.074)         | -0.028 to 0.575         | -10.94        | NS                      |                         |               |
| Body Width (average)           |                     | Measured              |                     | NS                   |                       |                | NS                    |                          |                | 1.763 (0.086)         | -0.002 to 0.026         | -5.724        | NS                      |                         |               |
| Body Length                    |                     | Measured              |                     | 1.852 (0.072)        | -0.004 to 0.087       | 216.029        | NS                    |                          |                | 2.311 (0.026)         | 2.880E-4 to 0.004       | -2.231        | <b>-5.371 (4.00E-6)</b> | <b>-0.013 to -0.006</b> | <b>36.686</b> |
